# Supplementary material for: The fabrication of helical fibers with circularly polarized luminescence via ionic linkage of binaphthol and tetraphenylethylene derivatives
Source: Royal Society of Chemistry journal article supplement (doi:10.1039/c5tc04174k), 2016-01-01
Supplement: c5tc04174k1.pdf [file c5tc04174k1.pdf]

## Supporting Information

### Helical Fibers with Circularly Polarized Luminescence via Ionic Linkage of Binaphthol and Tetraphenylethylene Derivatives

Qiang Ye, Dandan Zhu, Lianyi Xu, Xuemin Lu, Qinghua Lu\*

School of Chemistry and Chemical Engineering, State Key Laboratory of Metal Matrix Composites, Shanghai Jiao Tong University, Shanghai 200240, China.

\*e-mail: [qhlu@sjtu.edu.cn](mailto:qhlu@sjtu.edu.cn)

#### Table of Contents

**Scheme S1.** Synthetic routes for ionic compounds **TPEHexN<sup>+</sup>** and **R-/S-BNPSO<sub>3</sub><sup>-</sup>**.

**Figure S1.** <sup>1</sup>H NMR spectrum of 4-methoxy tetraphenylethylene (compound **1**).

**Figure S2.** <sup>1</sup>H NMR spectrum of 4-hydroxy tetraphenylethylene (compound **2**).

**Figure S3.** <sup>13</sup>C NMR spectrum of 4-hydroxy tetraphenylethylene (compound **2**).

**Figure S4.** <sup>1</sup>H NMR spectrum of compound **TPEHBr**.

**Figure S5.** <sup>1</sup>H NMR spectrum of compound **TPEHN<sup>+</sup>**.

**Figure S6.** <sup>13</sup>C NMR spectrum of compound **TPEHN<sup>+</sup>**.

**Figure S7.** <sup>1</sup>H NMR spectrum of compound **(R)-BNPSO<sub>3</sub><sup>-</sup>**.

**Figure S8.** <sup>13</sup>C NMR spectrum of compound **(R)-BNPSO<sub>3</sub><sup>-</sup>**.

**Figure S9.** <sup>1</sup>H NMR spectrum of compound **(S)-BNPSO<sub>3</sub><sup>-</sup>**.

**Figure S10.** <sup>13</sup>C NMR spectrum of compound **(S)-BNPSO<sub>3</sub><sup>-</sup>**.

**Figure S11.** <sup>1</sup>H NMR spectrum of compound **RBNP-TPEHN**.

**Figure S12.** <sup>1</sup>H NMR spectrum of compound **SBNP-TPEHN**.

**Figure S13.** HRMS spectrum of compound **TPEHN<sup>+</sup>**.

**Figure S14.** a) <sup>1</sup>H NMR spectrum of **SBNP-TPEHN** assembly; b) FT-IR spectra of **TPEHN<sup>+</sup>**, **S-BNPSO<sub>3</sub><sup>-</sup>** and **SBNP-TPEHN** assembly in KBr pellets.

**Figure S15.** The UV-vis absorption, CD, and gabs spectra of **SBNP-TPEHN** in methanol / water with a concentration of  $5 \times 10^{-6}$  M at various temperatures.

**Figure S16.** CD spectra of **RBNP-TPEHN** and **SBNP-TPEHN** in methanol solution with a concentration of  $3 \times 10^{-6}$  M.

**Figure S17.** CD spectra of **TPEHN** mixed with (R)- or (S)-1,1'-bi-2-naphthol film. The film prepared by dropped 2 mg / ml **TPEHN** mixed (R)- or (S)-1,1'-bi-2-naphthol ( mol /mol=2:1) DCM solution on silicon wafer substrates after solvent evaporation.

**Figure S18.** CD/CPL and PL spectra of **RBNP-TPEHN** (a)/(c) and **SBNP-TPEHN** (b)/(d) at different rotation angles.

**Figure S19.** UV/vis absorption (a) and normalized photoluminescence (b) Spectra of **RBNP-TPEHN** (blue) and **SBNP-TPEHN** (red) in solid state. Excitation wavelength: 340 nm. (Inset image: luminescence photos of **RBNP-TPEHN** (right) and **SBNP-TPEHN** (left) assemblies cast on silicon quartz when exposed to UV lamp of 365 nm.)

**Figure S20.** Aggregation-induced luminescence property of **RBNP-TPEHN**. **RBNP-TPEHN**

was dissolved in mixed solution of DMF / water at a concentration of  $5 \times 10^{-6}$  M (DMF, 50%, 70%, 80%, 90%, 95%). Excitation wavelength: 320 nm.

**Figure S21.** Aggregation-induced luminescence property of **SBNP-TPEHN**. **SBNP-TPEHN** was dissolved in mixed solution of DMF/water at a concentration of  $5 \times 10^{-6}$  M (DMF, 50%, 70%, 80%, 90%, 95%). Excitation wavelength: 320 nm.

**Figure S22.** Structural simulation of **RBNP-TPEHN** molecule DFT calculations B3LYP/6-31G\* level in Gaussian 03 program.

**Figure S23.** TEM images of **RBNP-TPEHN** assemblies. SEM analysis was performed on silicon wafer substrates after naturally evaporation of 0.02 mg/mL drops of **RBNP-TPEHN** assemblies in chloroform/ethanol mixture (9:1, v/v). Scale bar: a) 500 nm; b) 100 nm; c) 50 nm.

**Figure S24.** TEM images of **SBNP-TPEHN** assemblies. SEM analysis was performed on silicon wafer substrates after naturally evaporation of 0.02 mg/mL drops of **SBNP-TPEHN** assemblies in chloroform/ethanol mixture (9:1, v/v). Scale bar: a) 500 nm; b) 100 nm; c) 50 nm.

**Figure S25.** XRD patterns of **RBNP-TPEHN** (a) and **SBNP-TPEHN** (b) assemblies as cast films on silicon wafer substrates.

## Synthesis

**TPEHexN<sup>+</sup>** and **R-/S-BNPSO<sub>3</sub><sup>-</sup>** were synthesized according to Scheme S1. The chemical structures of all the precursors and ionic compounds were identified via NMR spectra, which were shown in Figure S1-7.

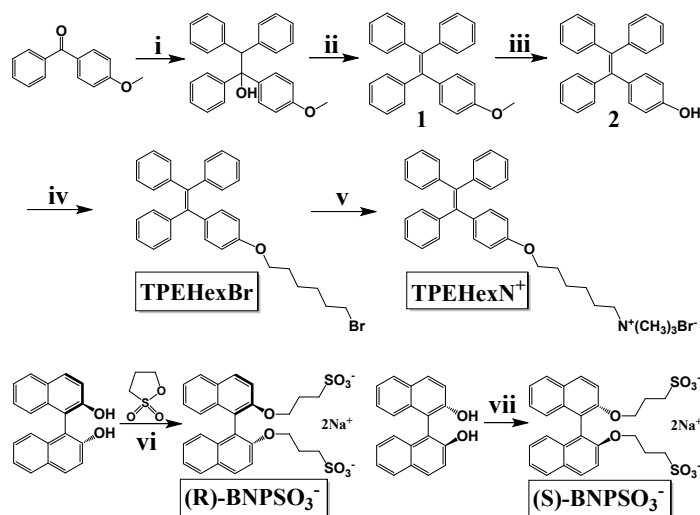

**Scheme S1.** Synthetic routes for ionic compounds **TPEHexN<sup>+</sup>** and **R-/S-BNPSO<sub>3</sub><sup>-</sup>**. <sup>a</sup> Conditions: (i) n-BuLi, THF, -5 °C, 12 h, (ii) p-toluene sulfonic acid, toluene, reflux, overnight, (iii) borontribromide, DCM, -78 °C, 12h, (iv) 1,6-dibromo hexane, K<sub>2</sub>CO<sub>3</sub>, DMF, 90 °C, 24 h, (v) trimethylamine, THF, 24 h, (vi) and (vii) 1,3-propanesultone, NaOH, ethyl alcohol, 100 °C, 2h.

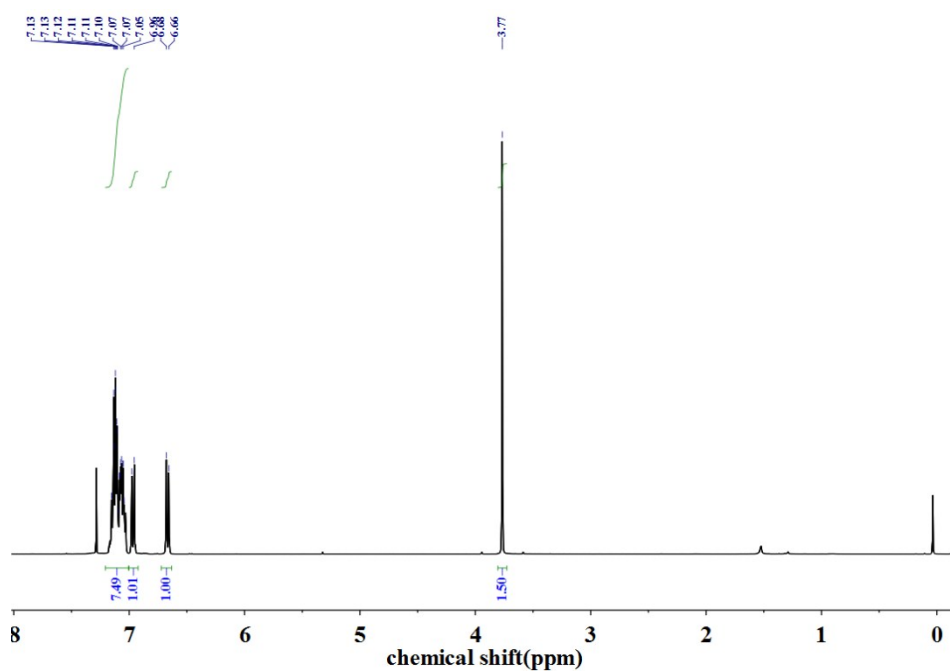

**Figure S1.** <sup>1</sup>H NMR spectrum of 4-methoxy tetraphenylethylene (compound 1).

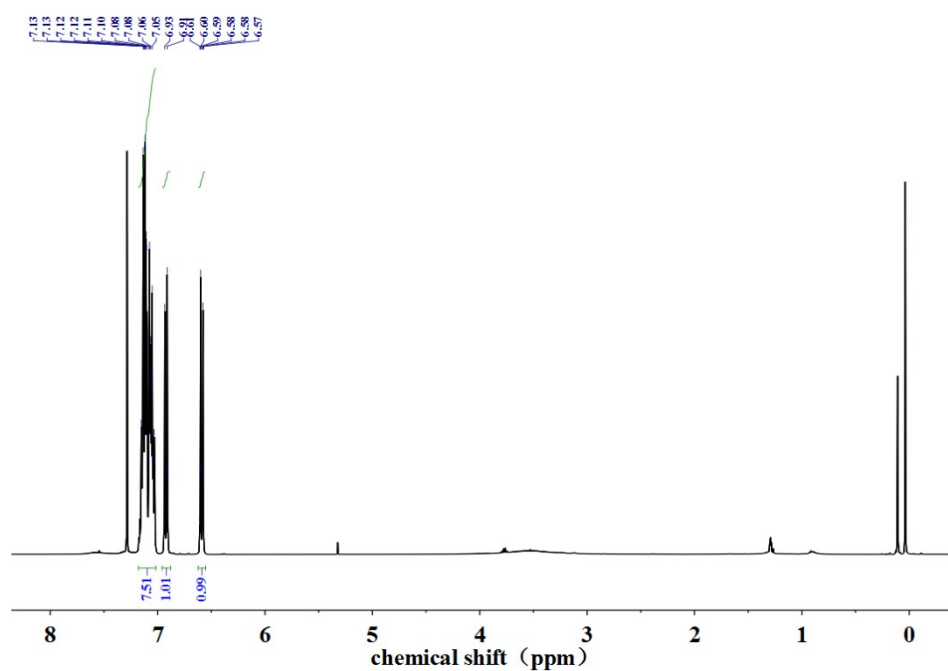

**Figure S2.** <sup>1</sup>H NMR spectrum of 4-hydroxy tetraphenylethylene (compound 2).

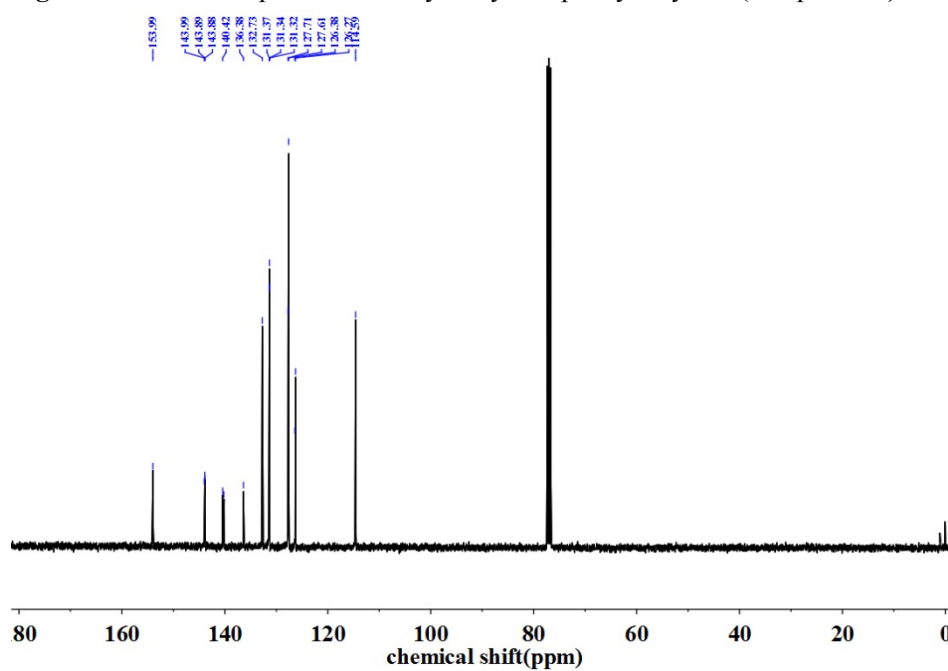

**Figure S3.** <sup>13</sup>C NMR spectrum of 4-hydroxy tetraphenylethylene (compound 2).

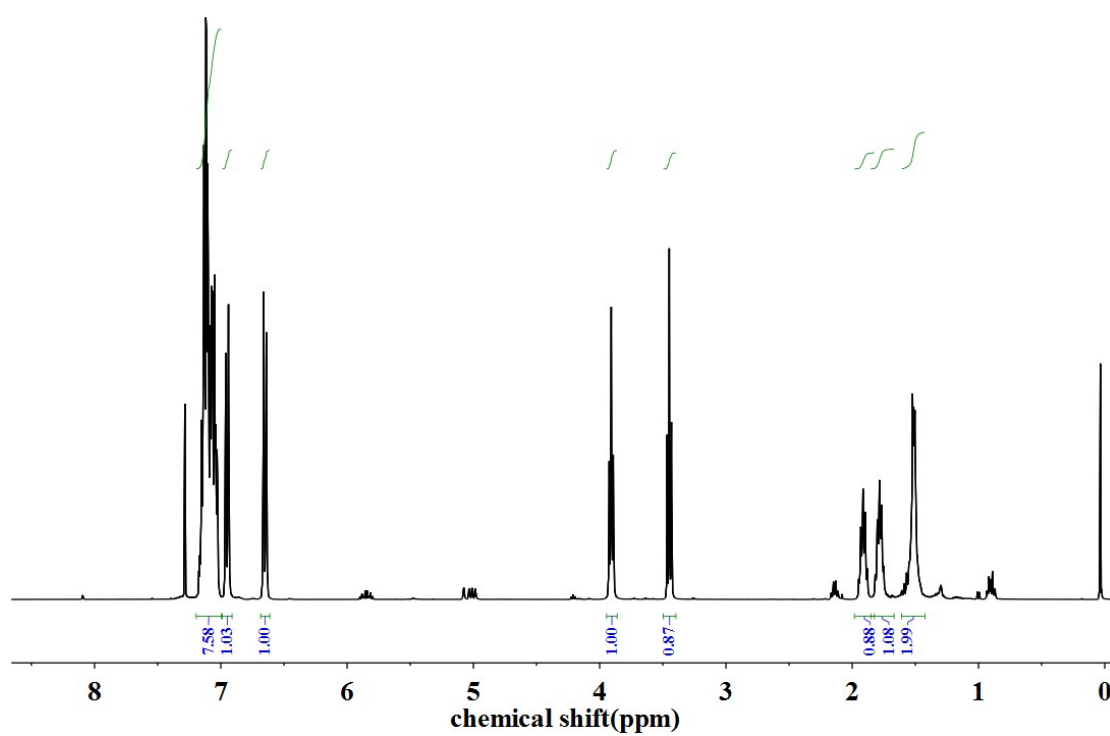

**Figure S4.** <sup>1</sup>H NMR spectrum of compound TPEHBr.

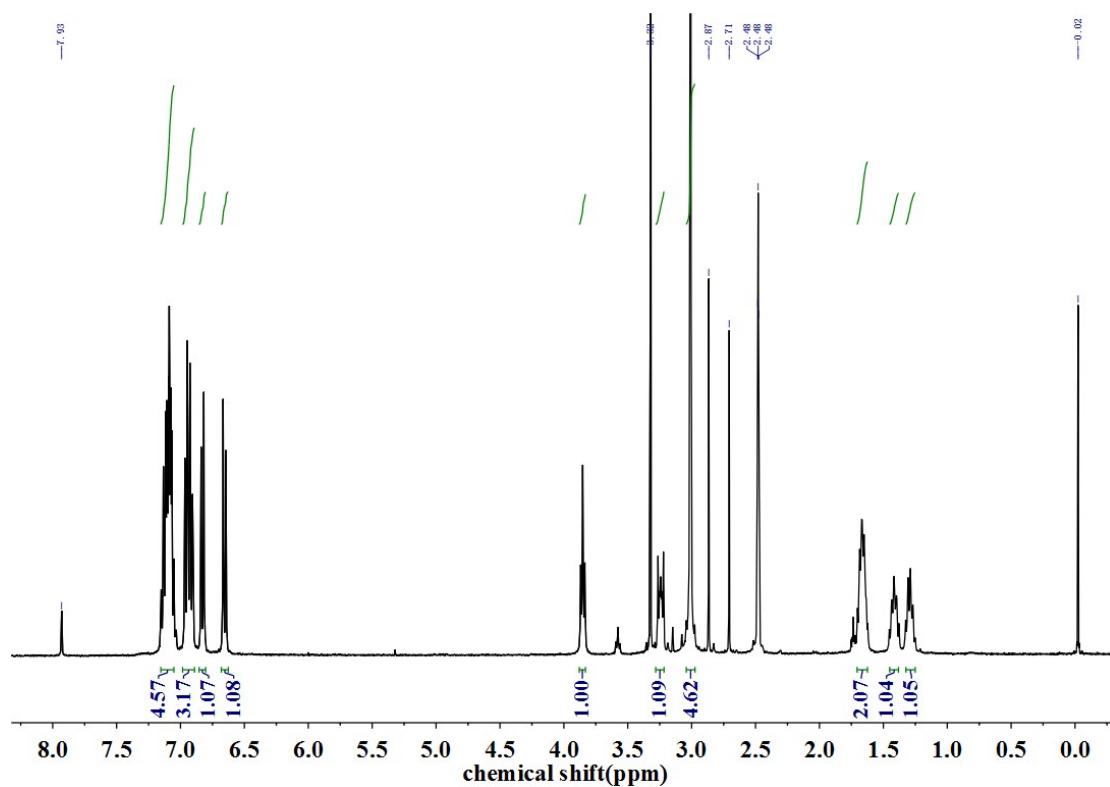

**Figure S5.** <sup>1</sup>H NMR spectrum of compound TPEHN<sup>+</sup>.

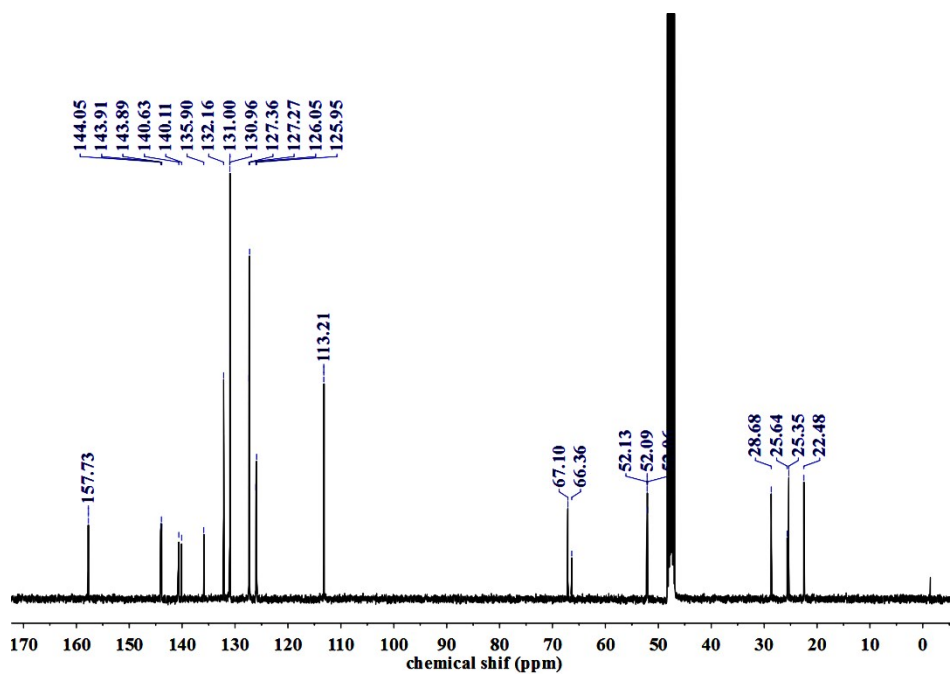

Figure S6. <sup>13</sup>C NMR spectrum of compound TPEHN<sup>+</sup>.

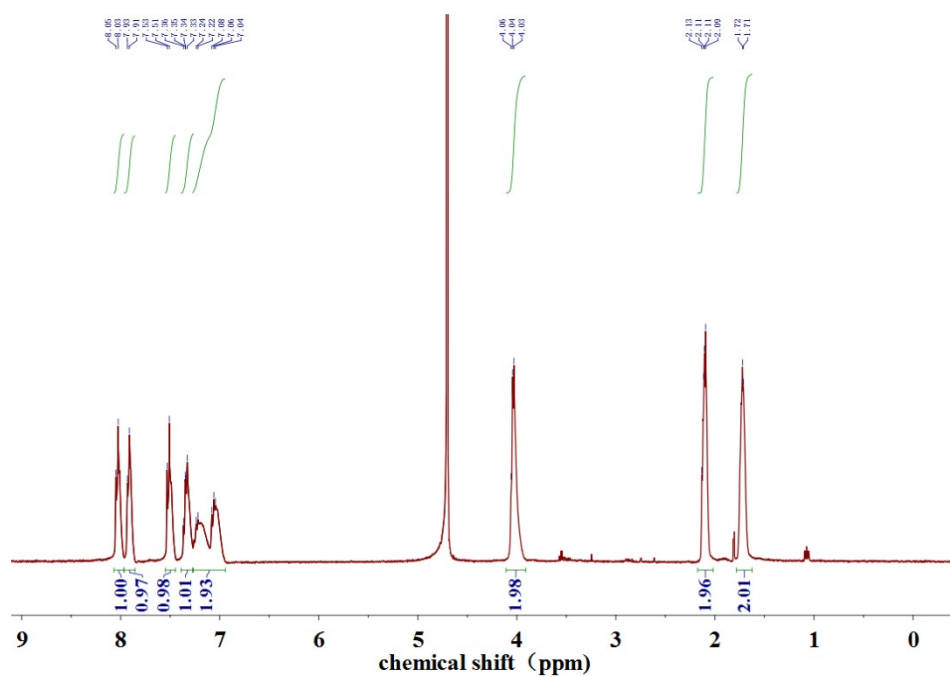

Figure S7. <sup>1</sup>H NMR spectrum of compound (R)-BNPSO<sub>3</sub><sup>-</sup>.

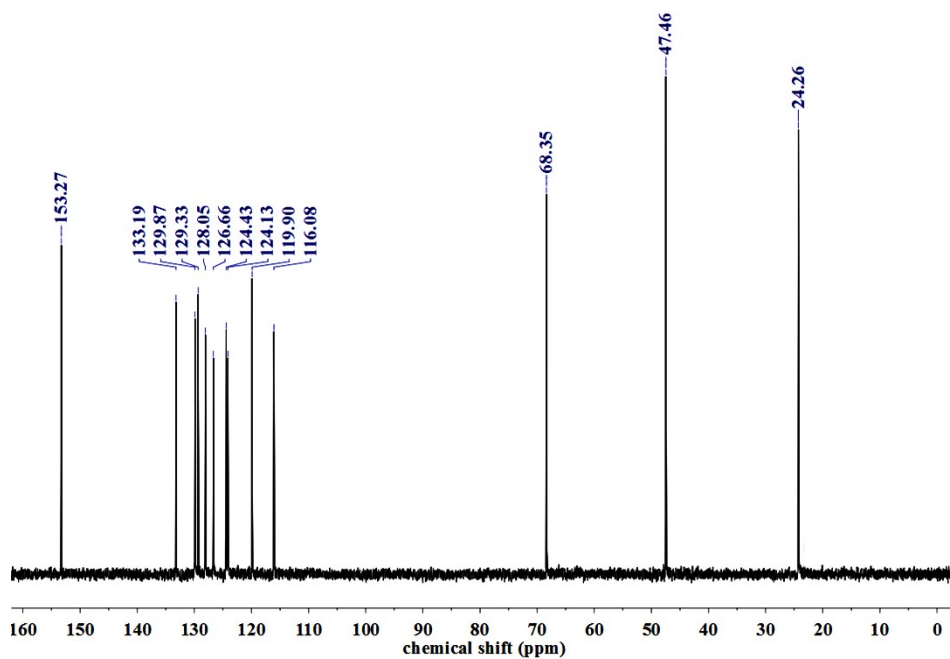

Figure S8. <sup>13</sup>C NMR spectrum of compound (R)-BNPSO<sub>3</sub><sup>-</sup>.

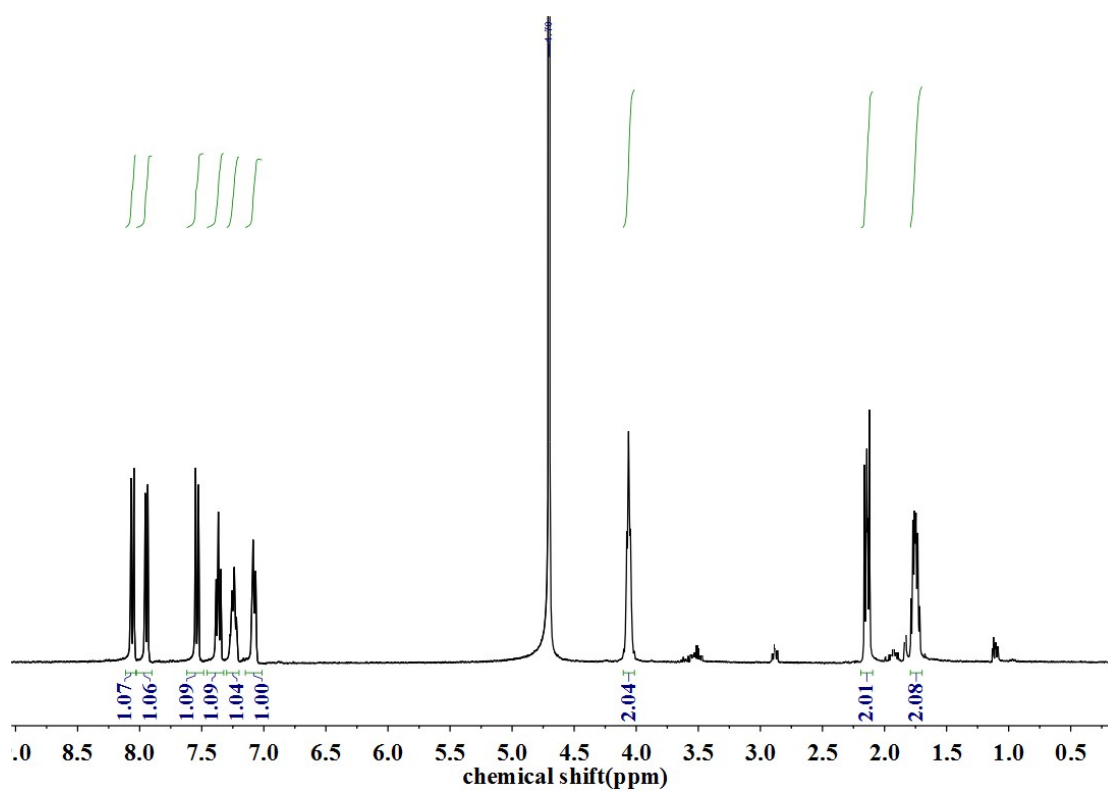

Figure S9. <sup>1</sup>H NMR spectrum of compound (S)-BNPSO<sub>3</sub><sup>-</sup>.

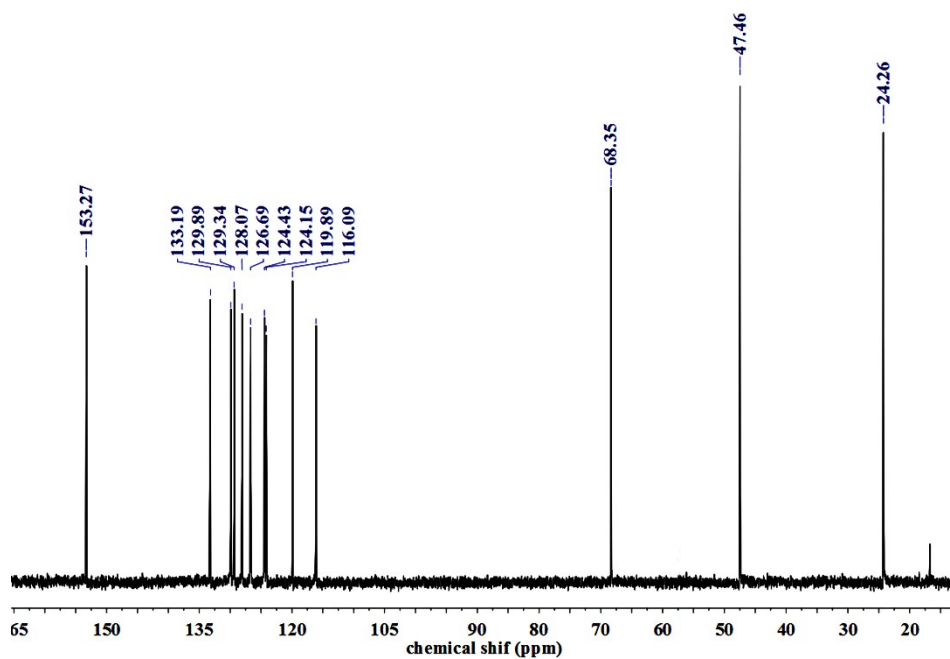

**Figure S10.** <sup>13</sup>C NMR spectrum of compound (S)-BNPSO<sub>3</sub><sup>-</sup>.

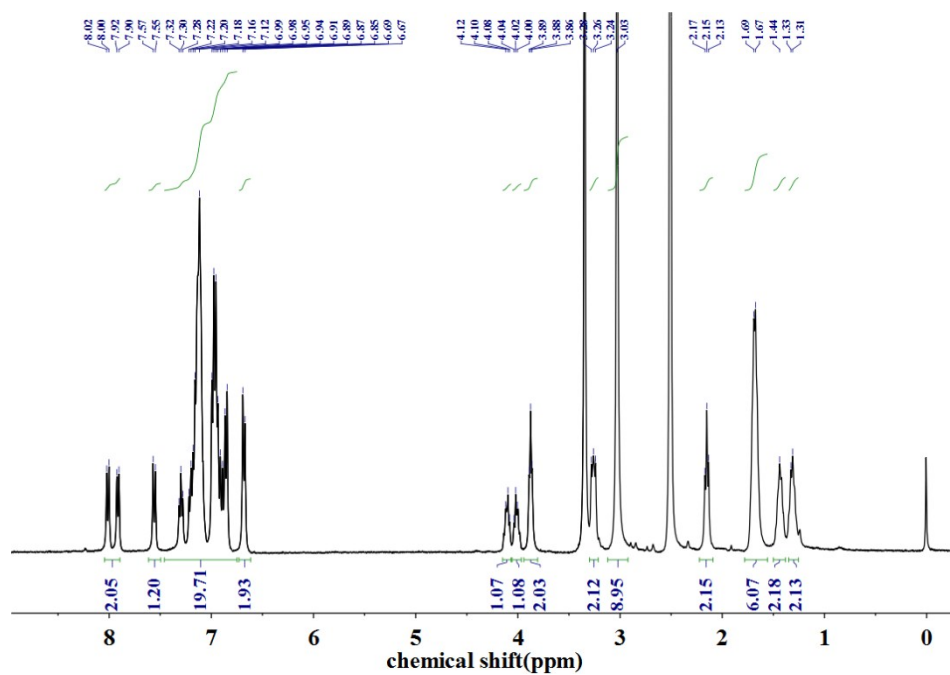

**Figure S11.** <sup>1</sup>H NMR spectrum of compound RBNP-TPEHN.



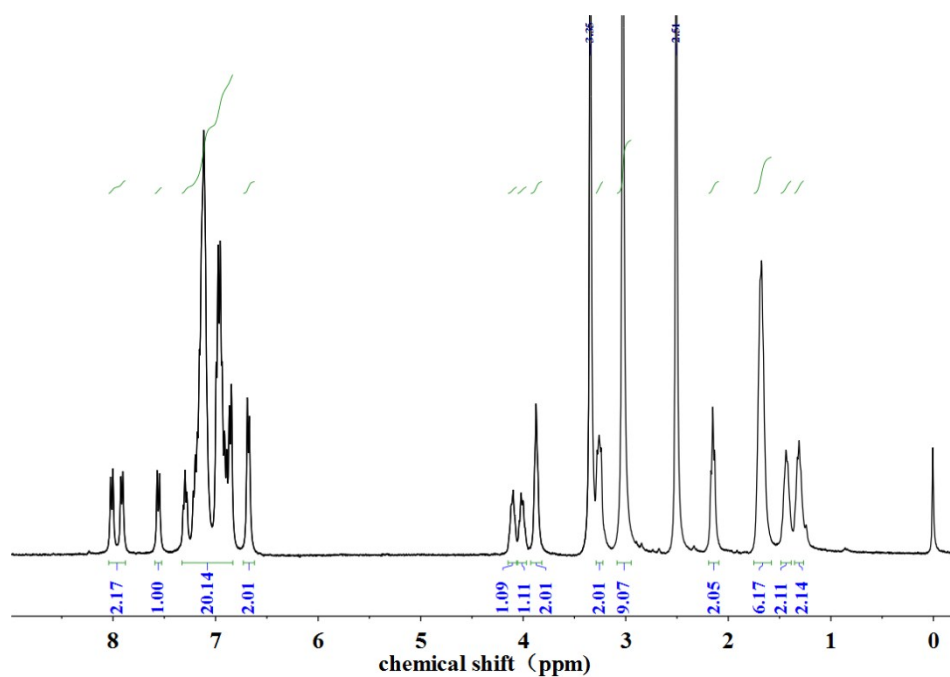

**Figure S12.**  $^1\text{H}$  NMR spectrum of compound SBNP-TPEHN.

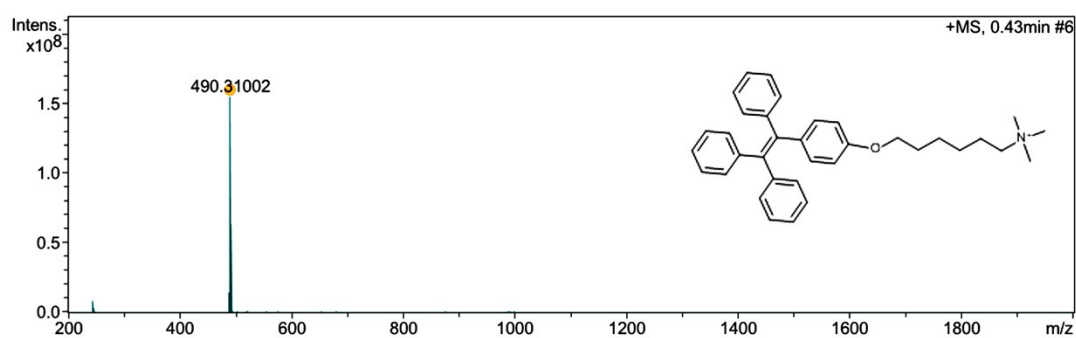

**Figure S13.** HRMS spectrum of compound TPEHN $^+$ .

### Characterization of RBNP-TPEHN and RBNP-TPEH

The  $^1\text{H}$  NMR and FTIR spectra of obtained **SBNP-TPEHN** and **RBNP-TPEH** assemblies were presented in Figure S10 and Figure 1, respectively.

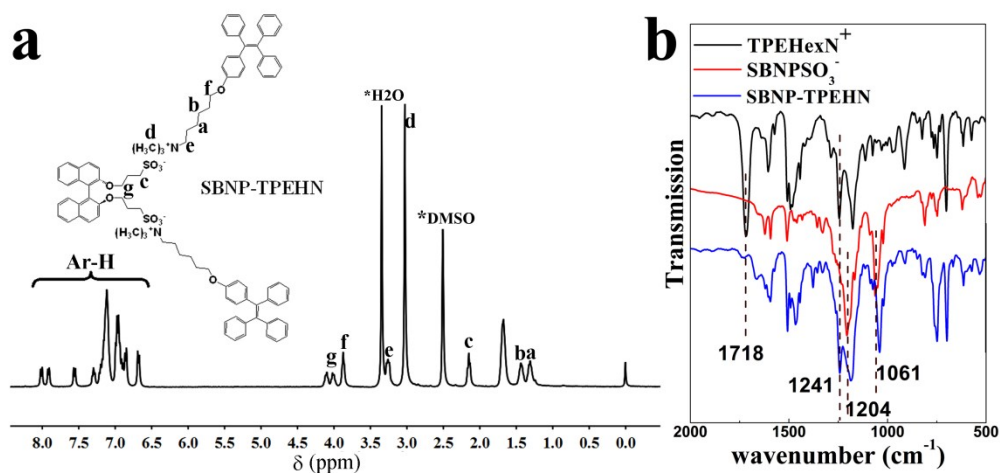

**Figure S14.** a)  $^1\text{H}$  NMR spectrum of SBNP-TPEHN assembly; b) FT-IR spectra of TPEHN $^+$ , S-BNPSO $_3^-$  and SBNP-TPEHN assembly in KBr pellets.

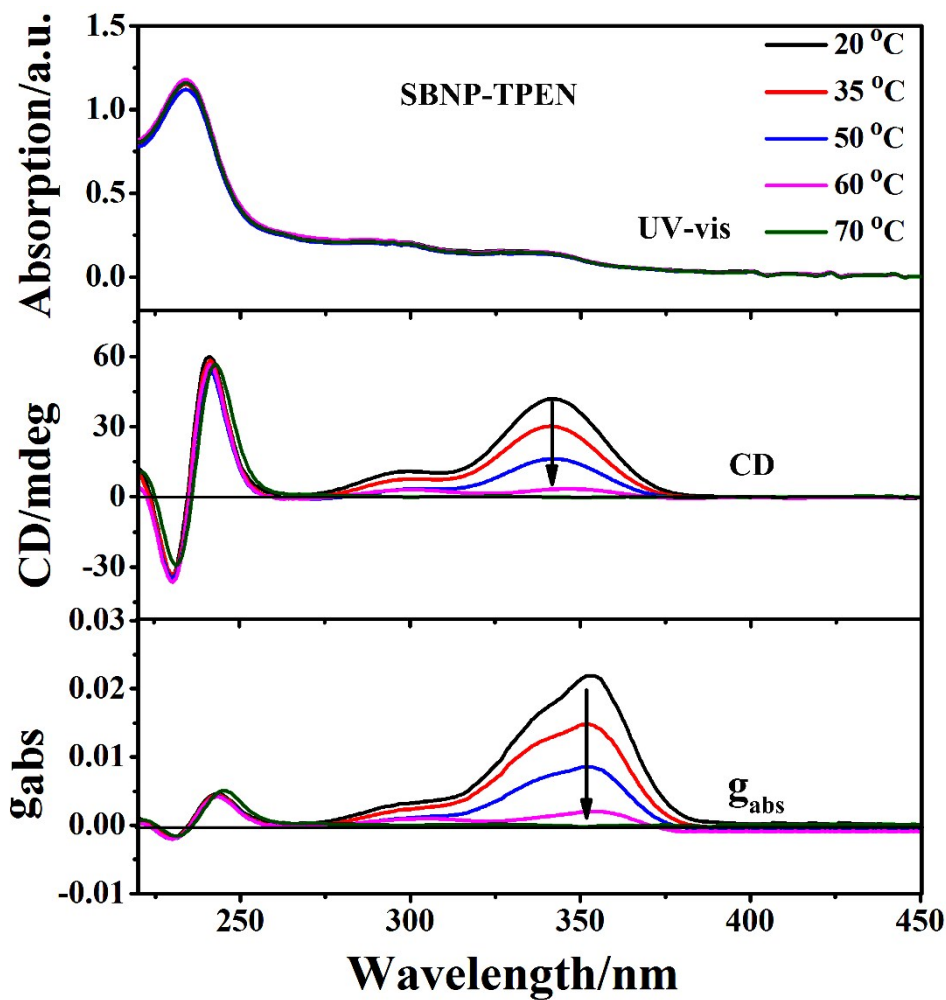

**Figure S15.** The UV-vis absorption, CD, and gabs spectra of SBNP-TPEHN in methanol / water (v/v=1:10) with a concentration of  $5 \times 10^{-6}$  M at various temperatures.

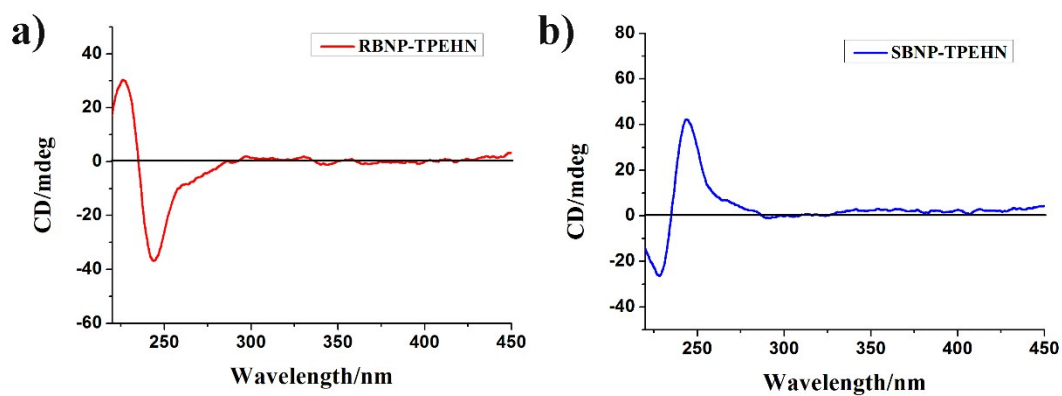

**Figure S16.** CD spectra of **RBNP-TPEHN** and **SBNP-TPEHN** in methanol solution with a concentration of  $3 \times 10^{-6}$  M.

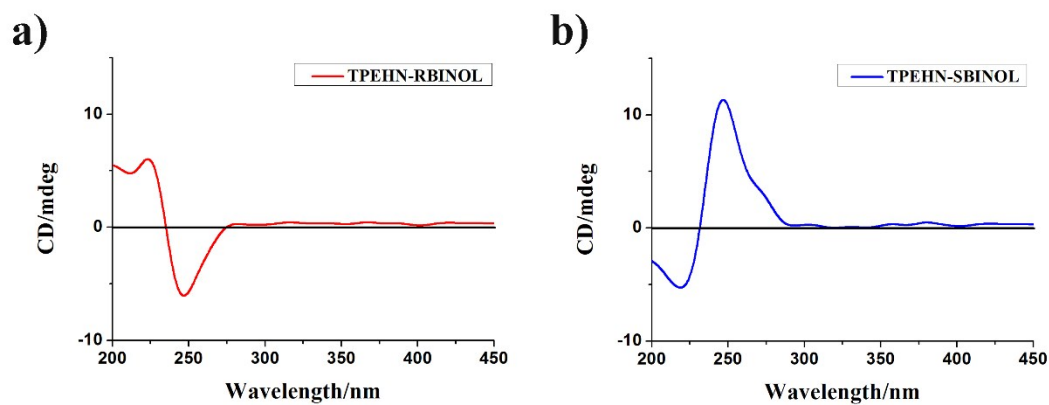

**Figure S17.** CD spectra of **TPEHN** mixed with (R)- or (S)-1,1'-bi-2-naphthol film. The film prepared by dropping 2 mg / ml DCM mixture of **TPEHN** and (R)- or (S)-1,1'-bi-2-naphthol (mol /mol=2:1) on silicon wafer substrates after solvent evaporation.

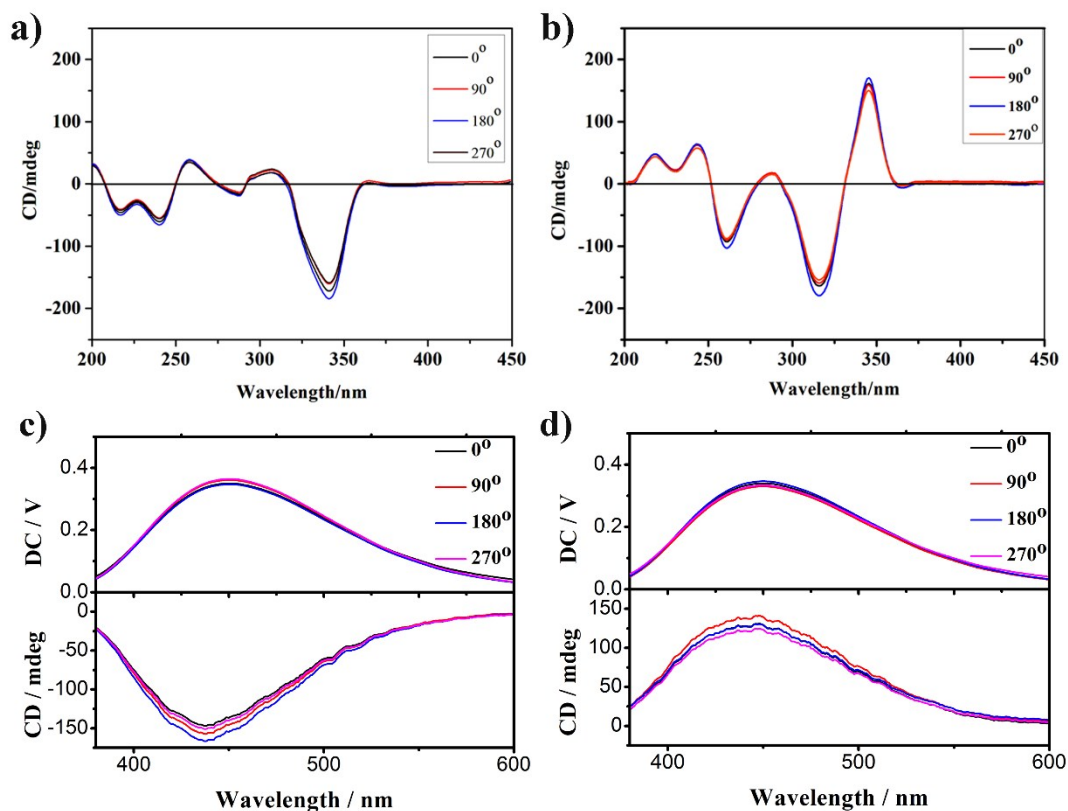

**Figure S18.** CD/CPL and PL spectra of **RBNP-TPEHN** (a)/(c) and **SBNP-TPEHN** (b)/(d) at different rotation angles.

### Optical properties

The optical properties of **RBNP-TPEHN** and **SBNP-TPEHN** as cast films were studied using UV/vis and photoluminescence (PL) spectroscopies. The cast films were prepared by dissolving **RBNP-TPEHN** and **SBNP-TPEHN** assemblies in mixture of chloroform/ethanol (v/v=9/1) at a concentration of 0.5 mg/mL, then casting on quartz plates and being dried by natural evaporation.

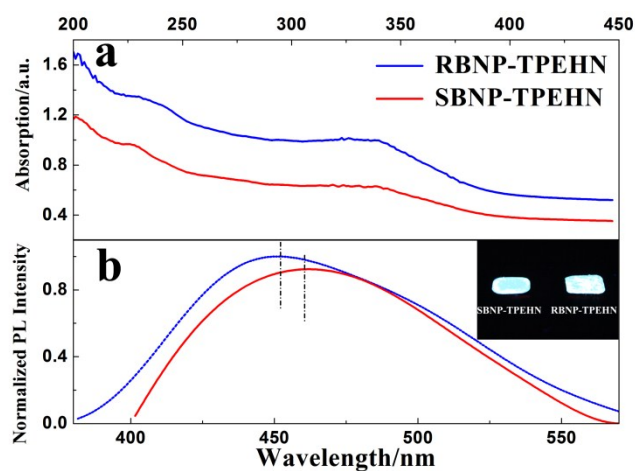

**Figure S19.** UV/vis absorption (a) and normalized photoluminescence (b) spectra of **RBNP-TPEHN** (blue) and

**SBNP-TPEHN** (red) in solid state. Excitation wavelength: 340 nm. (Inset image: luminescence photos of **RBNP-TPEHN** (right) and **SBNP-TPEHN** (left) assemblies cast on silicon quartz when exposed to UV lamp of 365 nm.)

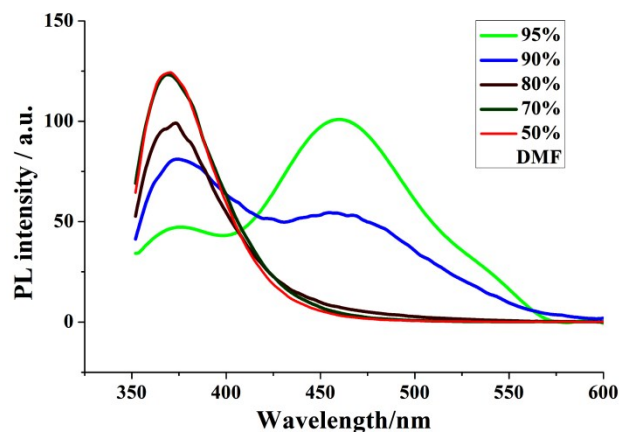

**Figure S20.** Aggregation-induced luminescence property of **RBNP-TPEHN**, which was dissolved in mixed solution of DMF / water at a concentration of  $5 \times 10^{-6}$  M (DMF, 50%, 70%, 80%, 90%, 95%). Excitation wavelength: 320 nm.

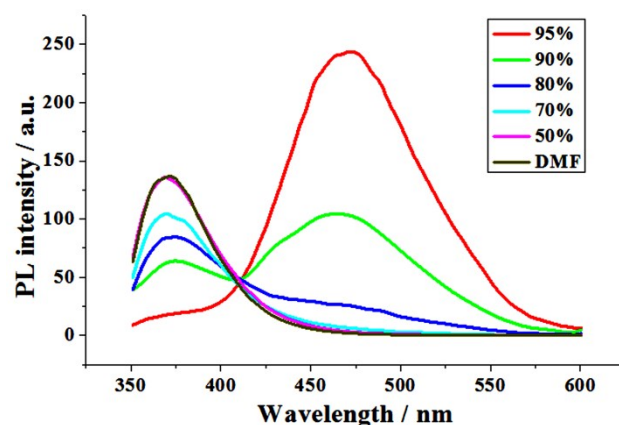

**Figure S21.** Aggregation-induced luminescence property of **SBNP-TPEHN**, which was dissolved in mixed solution of DMF/water at a concentration of  $5 \times 10^{-6}$  M (DMF, 50%, 70%, 80%, 90%, 95%). Excitation wavelength: 320 nm.

Figure S15a showed the UV/vis absorption spectra of **RBNP-TPEHN** (blue curve) and **SBNP-TPEHN** (red curve) as cast films. Two absorption bands, corresponding to  $\pi$ - $\pi^*$  transition of binaphthalene moiety and  $\pi$ - $\pi^*$  transition of TPE moiety, were clearly observed at 228 nm and 340 nm, respectively. Figure S15b presents the normalized fluorescence spectra of **RBNP-TPEHN** (blue) and **SBNP-TPEHN** (red) as cast films. Obvious emission was observed at 465 nm for **SBNP-TPEHN**, and 457 nm for **RBNP-TPEHN** cast film. The inset image of Figure S16b shows PL photo of **RBNP-TPEHN** and **SBNP-TPEHN** cast films irradiated with 365 nm UV light. Very bright green light were emitted and clearly observed from both films. The quantum

yields of **RBNP-TPEHN** and **SBNP-TPEHN** in solid state were measured by steady-state and time-resolved fluorescence spectrofluorometer and presented high values of 42% and 43%, respectively. To further verify the aggregation-induced luminescence properties, fluorescence emission spectra of **RBNP-TPEHN** and **SBNP-TPEHN** in DMF/water mixtures with different ratio were also studied (see PL spectra shown in Figure S17, S18). When the ratio of water (poor solvent) increased up to 80%, emission at 470 nm was observed in the spectra. When the ratio of water kept increasing, the PL intensities dramatically enhanced, implying **RBNP-TPEHN** and **SBNP-TPEHN** exhibited typical AIE property. These results indicated the **R- or SBNP-TPEHN** still preserves the AIE feature.

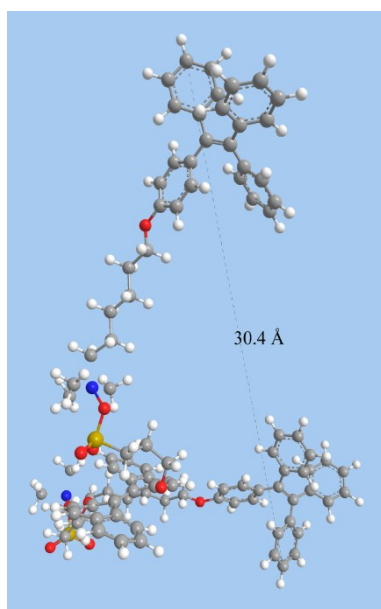

**Figure S22.** Structural simulation of SBNP-TPEHN molecule by DFT calculations B3LYP/6-31G\* level in Gaussian 03 program.

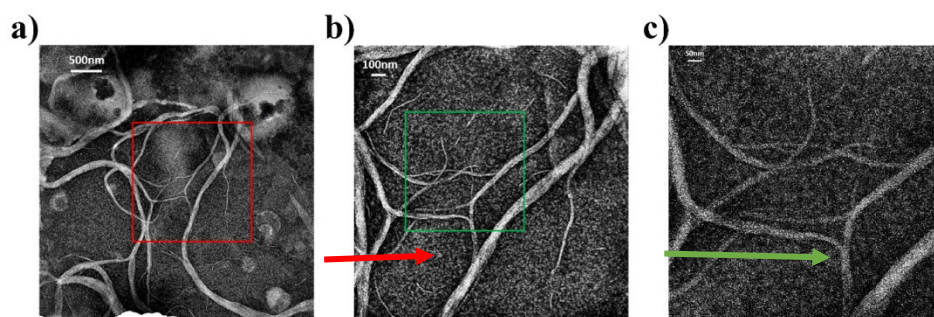

**Figure S23.** TEM images of **RBNP-TPEHN** assemblies. TEM analysis was performed on silicon wafer substrates after naturally evaporation of 0.02 mg/mL drops of **RBNP-TPEHN** assemblies in chloroform/ethanol mixture (9:1, v/v). Scale bar: a) 500 nm; b) 100 nm; c) 50 nm.



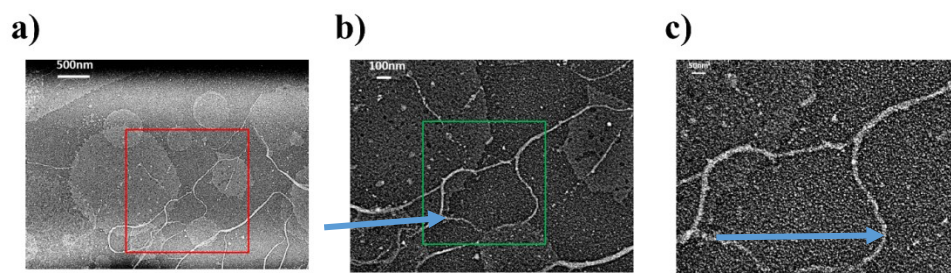

**Figure S24.** TEM images of **SBNP-TPEHN** assemblies. TEM analysis was performed on silicon wafer substrates after naturally evaporation of 0.02 mg/mL drops of **SBNP-TPEHN** assemblies in chloroform/ethanol mixture (9:1, v/v). Scale bar: a) 500 nm; b) 100 nm; c) 50 nm.

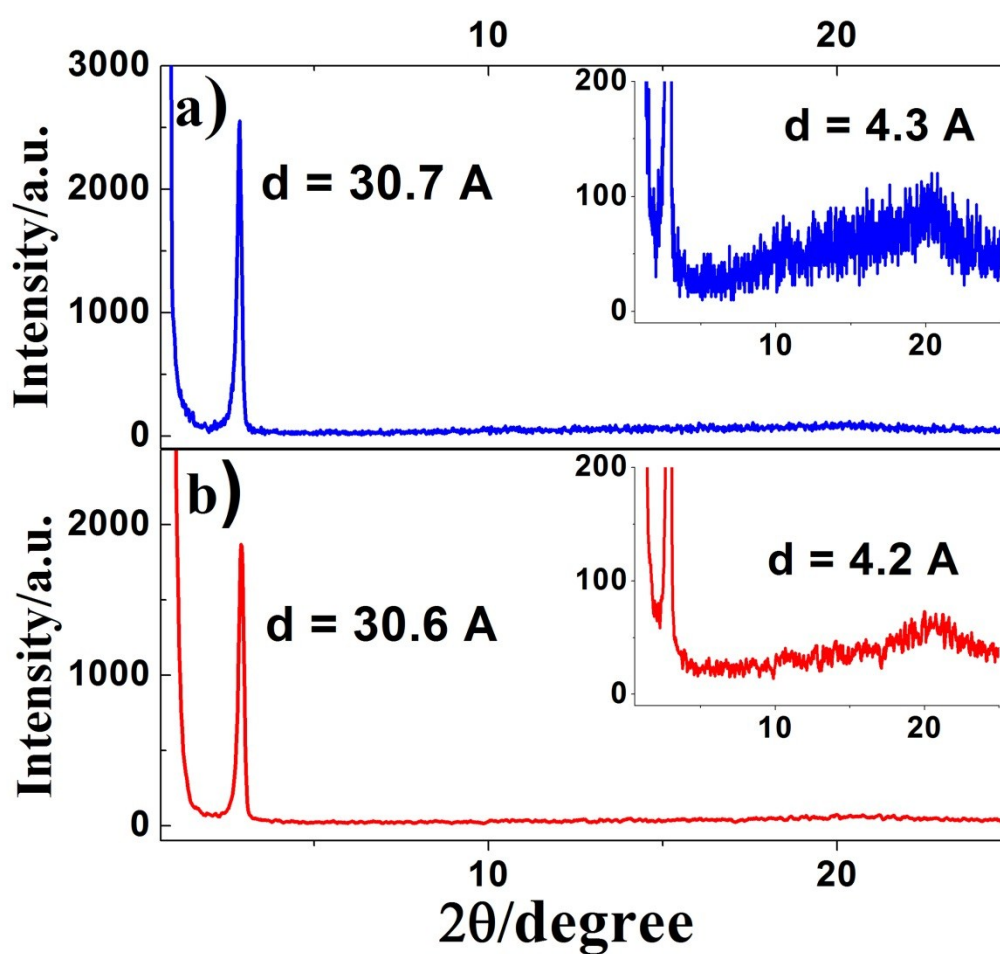

**Figure S25.** XRD patterns of **RBNP-TPEHN** (a) and **SBNP-TPEHN** (b) assemblies as cast films on silicon wafer substrates.
